# Supplementary material for: The Effect of Inflammatory Priming on the Therapeutic Potential of Mesenchymal Stromal Cells for Spinal Cord Repair
Source: MDPI journal article supplement (doi:10.3390/cells10061316), 2021-05-25
Supplement: s1 [file s1]

## Supplementary Information

### **The effect of inflammatory priming on the therapeutic potential of mesenchymal stromal cells for spinal cord repair**

Ines Maldonado-Lasunción <sup>1-4,\*</sup>, Agnes E. Haggerty <sup>2</sup>, Akinori Okuda <sup>2,5</sup>, Tokumitsu Mihara <sup>2,6</sup>, Natalia de la Oliva <sup>2</sup>, Joost Verhaagen <sup>1</sup> and Martin Oudega <sup>3,4,7,8\*</sup>

#### **List of contents:**

- I. Table S1: Primary antibodies used in this study
- II. Table S2: Secondary antibodies used in this study
- III. Figure S1: Macrophage inflammatory phenotype over time
- IV. Figure S2: Blood vessel presence in the rostral, central and caudal regions of the injury
- V. Figure S3: Hind limb sensorimotor performance

#### **I. Table S1. Primary antibodies used in this study**

| Antibody                   | Reactivity | Manufacturer | Catalog number | Concentration            | Triton* |
|----------------------------|------------|--------------|----------------|--------------------------|---------|
| <i>Rabbit anti-GFP</i>     | Rat        | Millipore    | AB3080P        | 1:1000                   | Yes     |
| <i>Mouse anti-GFAP</i>     | Rat        | Sigma        | G3893          | 1:500                    | Yes     |
| <i>Rabbit anti-NeuN</i>    | Rat        | Millipore    | ABN78          | 1:500                    | Yes     |
| <i>Mouse anti-NF</i>       | Rat        | Hybridoma    | Made in-house  | 1:3 (Conditioned medium) | Yes     |
| <i>Mouse anti-ED1</i>      | Rat        | Millipore    | MAB1435        | 1:200                    | No      |
| <i>Rabbit anti-CD86</i>    | Rat        | Abcam        | Ab53004        | 1:500                    | No      |
| <i>Rabbit anti-CD206</i>   | Rat        | Abcam        | Ab64693        | 1:500                    | No      |
| <i>Rabbit anti-CD163</i>   | Rat        | Abcam        | Ab182422       | 1:500                    | No      |
| <i>Mouse anti-RECA-1</i>   | Rat        | BioRad       | MCA970GA       | 1:200                    | No      |
| <i>Mouse anti-Occludin</i> | Rat        | Invitrogen   | 331500         | 1:250                    | Yes     |
| <i>Rabbit anti-ZO-1</i>    | Rat        | Invitrogen   | 402200         | 1:100                    | Yes     |

\* This column indicates whether the blocking solution contained Triton X100 (*i.e.* for intracellular stainings) or not (*i.e.* for extracellular stainings).

## II. Table S2. Secondary antibodies used in this study

| Primary target  | Antibody         | Conjugate | Manufacturer | Catalog number | Concentration |
|-----------------|------------------|-----------|--------------|----------------|---------------|
| <i>GFP</i>      | Goat anti-rabbit | AF-488    | ThermoFisher | A11008         | 1:500         |
| <i>GFAP</i>     | Goat anti-mouse  | AF-555    | Abcam        | Ab150114       | 1:500         |
| <i>NeuN</i>     | Goat anti-rabbit | AF-647    | ThermoFisher | A21245         | 1:500         |
| <i>NF</i>       | Goat anti-mouse  | AF-555    | Abcam        | Ab150114       | 1:500         |
| <i>ED1</i>      | Goat anti-mouse  | AF-647    | ThermoFisher | A21236         | 1:500         |
| <i>CD86</i>     | Goat anti-rabbit | AF-555    | ThermoFisher | A21428         | 1:500         |
| <i>CD206</i>    | Goat anti-rabbit | AF-555    | ThermoFisher | A21428         | 1:500         |
| <i>CD163</i>    | Goat anti-rabbit | AF-555    | ThermoFisher | A21428         | 1:500         |
| <i>RECA-1</i>   | Goat anti-mouse  | AF-555    | Abcam        | Ab150114       | 1:500         |
| <i>Occludin</i> | Goat anti-mouse  | AF-555    | Abcam        | Ab150114       | 1:500         |
| <i>ZO-1</i>     | Goat anti-rabbit | AF-647    | ThermoFisher | A21245         | 1:500         |

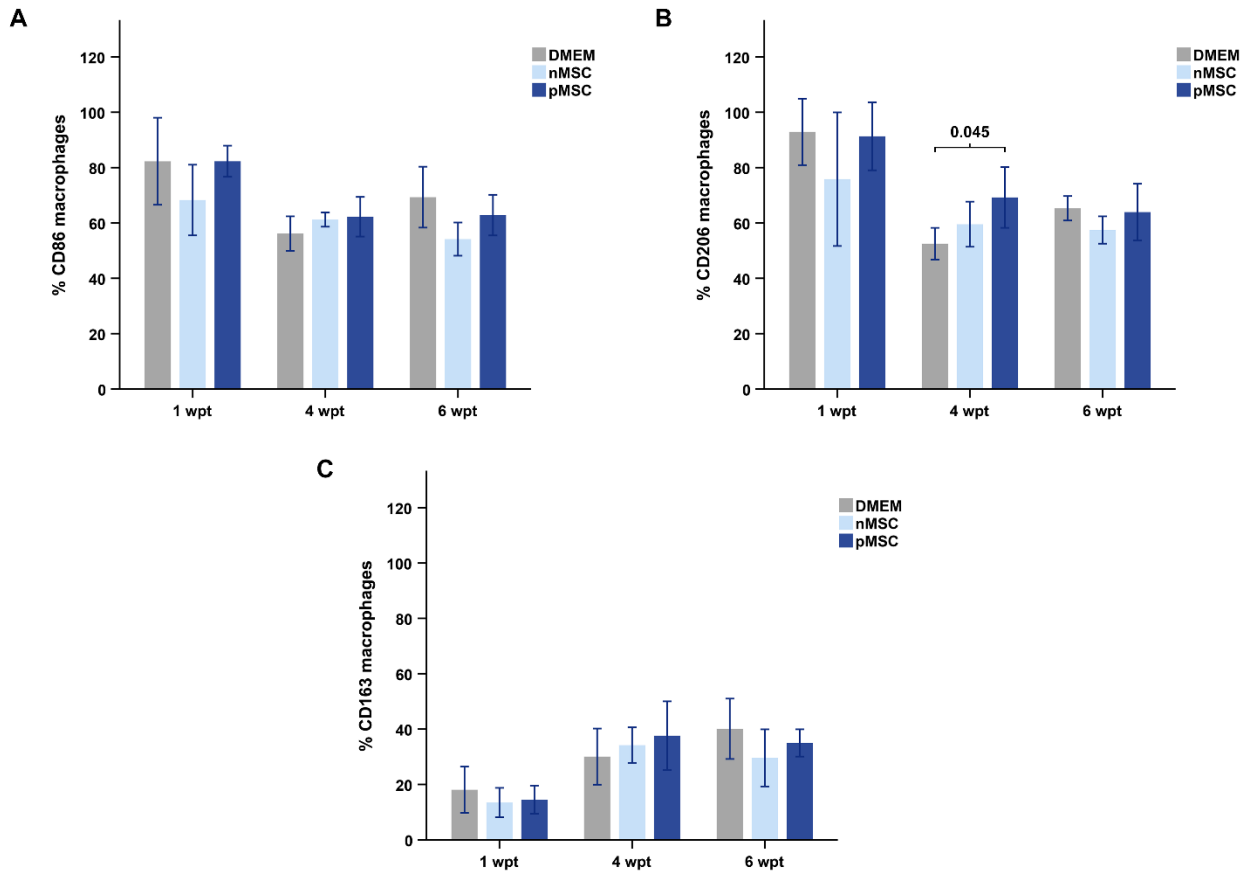

III. **Figure S1. Evolution of macrophage phenotype over time.** The percentage of each surface marker was calculated from the total of macrophages (ED1 positive) found in the injury site for each experimental group at 1, 4 and 6 wpt. **A.** Percentage of pro-inflammatory macrophages, positive for CD86. **B.** Percentage of early acting anti-inflammatory macrophages, positive for CD206. **C.** Percentage of late acting anti-inflammatory macrophages, positive for CD163. Bars and error bars represent the mean and SEM, respectively ( $N = 6$  per group and time point.). Abbreviations: wpt: weeks post transplantation; DMEM: Dulbecco's Modified Eagle's Medium (vehicle control); nMSC: naïve MSC; pMSC: primed MSC; MSC: mesenchymal stromal cell.

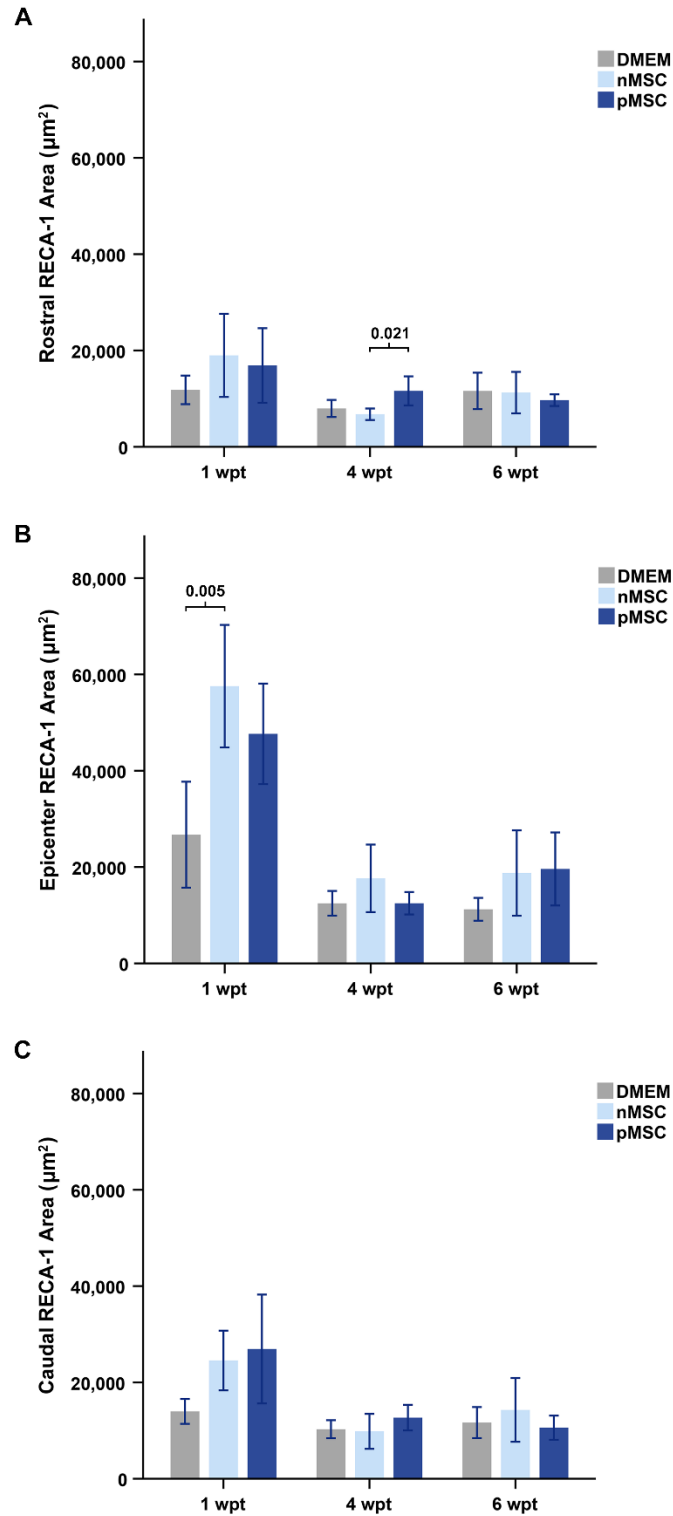

IV. **Figure S2. Blood vessel presence in and surrounding the injury site over time.** The area of RECA-1 staining was calculated in the areas just rostral (A), central (B) and caudal (C) to the injury for each experimental group at 1, 4 and 6 wpt. Bars and error bars represent

the mean and SEM, respectively ( $N = 6$  per group and time point.). Abbreviations: RECA-1: rat endothelial cell antigen 1; wpt: weeks post transplantation; DMEM: Dulbecco's Modified Eagle's Medium (vehicle control); nMSC: naïve MSC; pMSC: primed MSC; MSC: mesenchymal stromal cell.

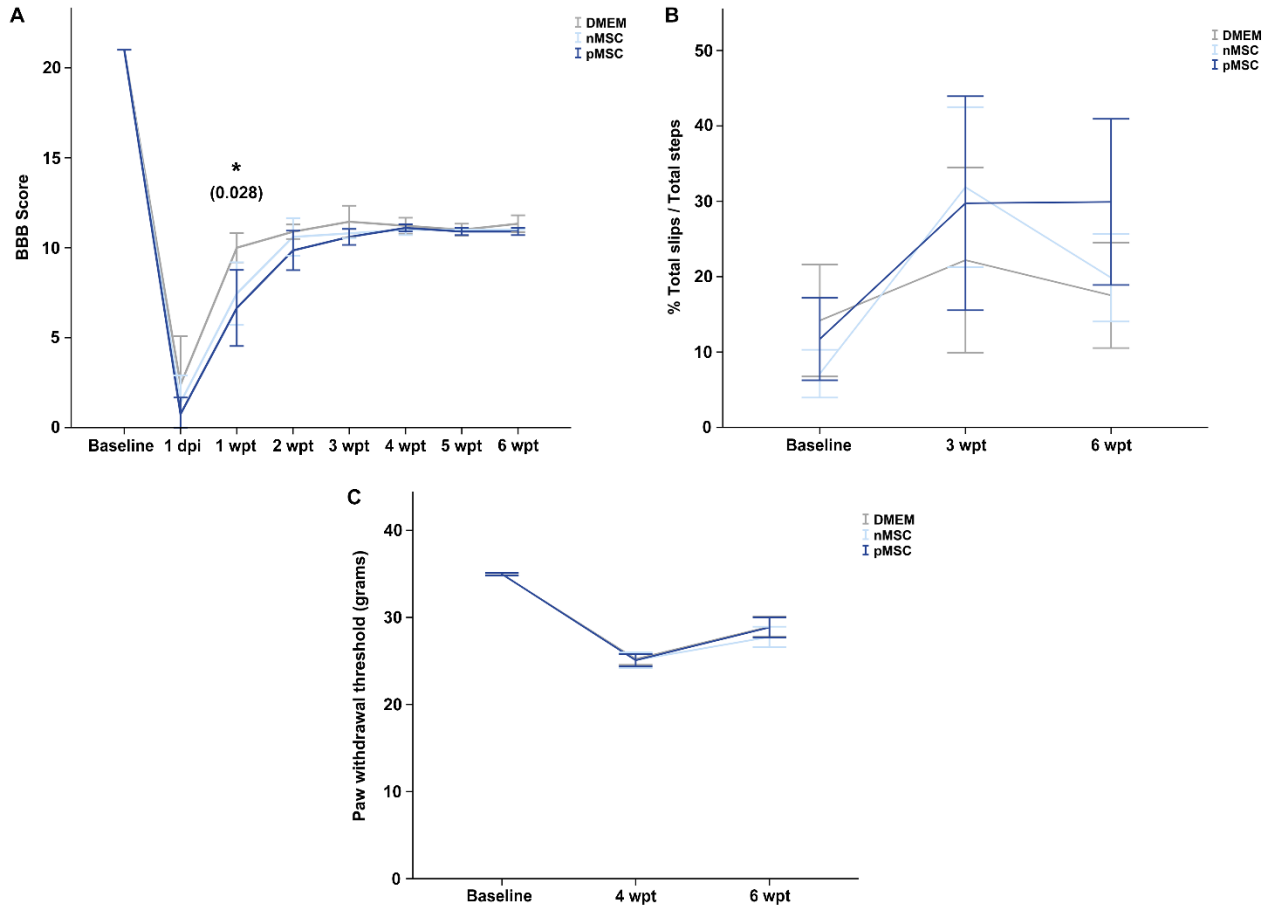

- V. **Figure S3. Locomotor and sensory performance was similar between all experimental groups over time.** (A) Overground walking ability improved similarly for all groups after SCI and transplantation. The graph represents the BBB locomotor scores before SCI (baseline), one day after SCI (1 dpi) and every week after transplantation at 3 days post-injury, up to 6 weeks. (B) Sensorimotor performance was similar among experimental groups across time, as shown by the percentage of slips on the horizontal ladder test. The graph represents the percentage of total steps that resulted in a slip at baseline and 3 and 6 weeks after transplantation. (C) Sensitivity to mechanical stimulation was similar between groups at baseline and 4 and 6 weeks after transplantation, as seen by the Von Frey hypersensitivity test. Points and error bars represent the mean and SEM, respectively ( $N = 10$  per group and time point.). Abbreviations: DMEM: Dulbecco's Modified Eagle's Medium (vehicle control); nMSC: naïve MSC; pMSC: primed MSC; MSC: mesenchymal stromal cell; dpi: days post injury; wpt: weeks post transplant.
